# Supplementary material
Source: Springer Nature journal article supplement (https://www.springermedizin.de/resource/supplementary/13741_2014_38_MOESM1_ESM.pdf/9682062)

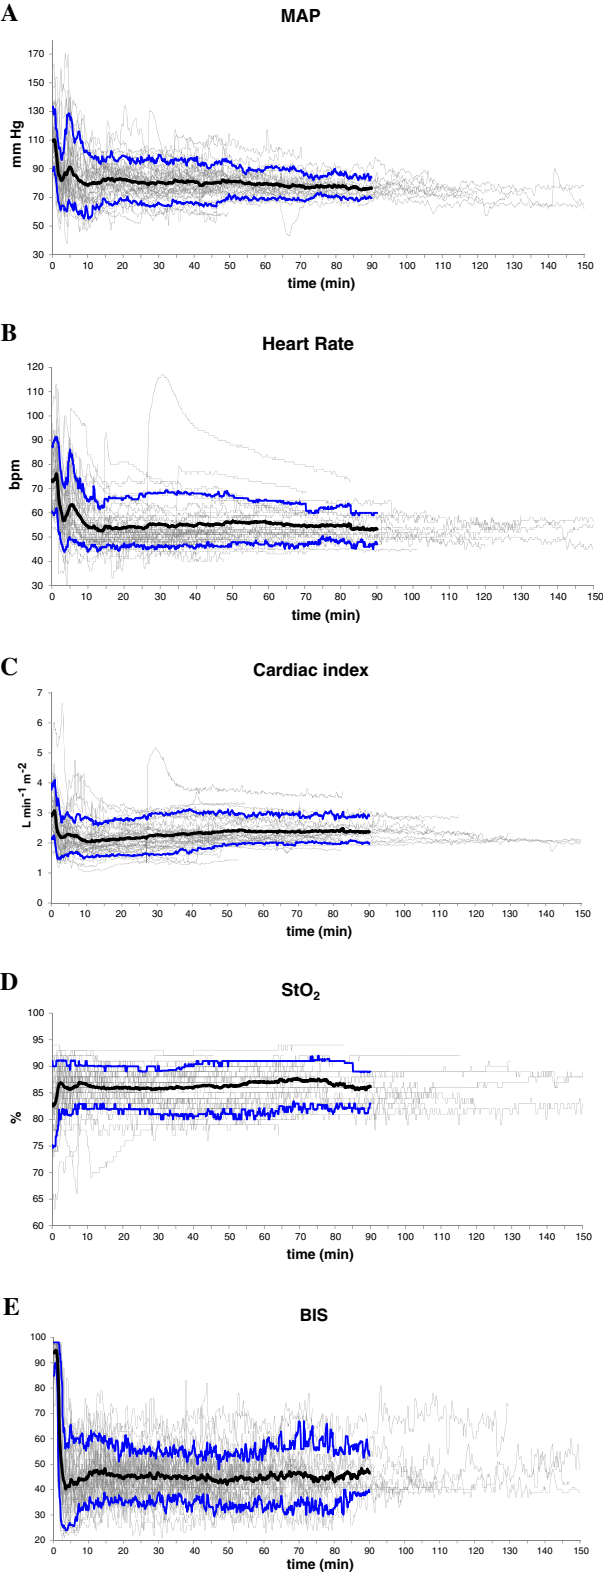

Supplement: MOESM1 [file 9682062]
